# Supplementary material for: A new reduction method based on simultaneous Ti3AlC2 support etching and metal deposition to prepare Pt catalysts for aqueous-phase selective hydrogenation of furfural to furfuryl alcohol
Source: Royal Society of Chemistry journal article supplement (doi:10.1039/d2nj02245a), 2022-01-01
Supplement: d2nj02245a1.pdf [file d2nj02245a1.pdf]

## Electronic Supplementary Information

### **A new reduction method based on simultaneous $\text{Ti}_3\text{AlC}_2$ support etching and metal deposition to prepare Pt catalysts for aqueous-phase selective hydrogenation of furfural to furfuryl alcohol**

Liang Shi,<sup>a</sup> Kun Lu,<sup>b\*</sup> Xiao Kong,<sup>b</sup> Licheng Li,<sup>a\*</sup> Xiaoli Gu,<sup>a</sup> Junmeng Cai,<sup>c</sup>

Xingguang Zhang<sup>a,b\*</sup>

<sup>a</sup> College of Chemical Engineering, Nanjing Forestry University, 159 Longpan Road, Nanjing 210037, P.R. China.

<sup>b</sup> School of Materials and Chemistry, University of Shanghai for Science and Technology, 516 Jungong Road, Shanghai 200093, P.R. China.

<sup>c</sup> Biomass energy engineering research center, School of Agriculture and Biology, Shanghai Jiao Tong University, No. 800 Dongchuan Road, Shanghai 200240, People's Republic of China

Corresponding author: K. Lu, [klu@usst.edu.cn](mailto:klu@usst.edu.cn); L.L. Cheng, [l1c0024@yahoo.com](mailto:l1c0024@yahoo.com);

X.G. Zhang, [x.g.zhang@usst.edu.cn](mailto:x.g.zhang@usst.edu.cn)

## Section 1

High resolution XPS spectra of C1s and O1s and detailed information on binding energies and deconvoluted peaks.

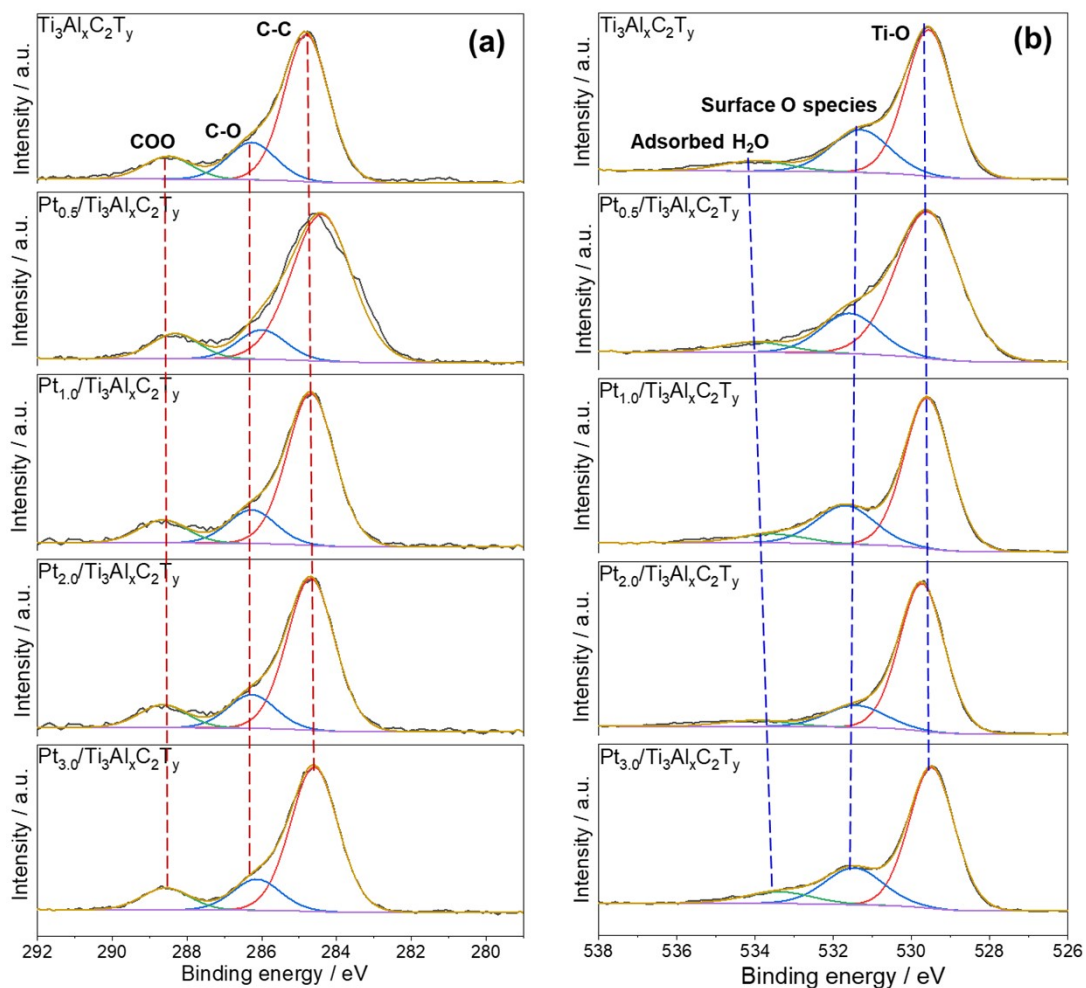

**Figure s1.** High resolution XPS spectra and deconvoluted peaks of C1s (a) and O1s (b) of samples  $\text{Ti}_3\text{Al}_x\text{C}_2\text{T}_y$ ,  $\text{Pt}_{0.5}/\text{Ti}_3\text{Al}_x\text{C}_2\text{T}_y$ ,  $\text{Pt}_{1.0}/\text{Ti}_3\text{Al}_x\text{C}_2\text{T}_y$ ,  $\text{Pt}_{2.0}/\text{Ti}_3\text{Al}_x\text{C}_2\text{T}_y$ , and  $\text{Pt}_{3.0}/\text{Ti}_3\text{Al}_x\text{C}_2\text{T}_y$ .

**Table s1.** Detailed binding energies and fractions of sub-species deconvoluted from high-resolution XPS spectra of C1s and O1s.

| Catalysts                                                                        |                | C1s          |              |              | O1s          |                               |                                             |
|----------------------------------------------------------------------------------|----------------|--------------|--------------|--------------|--------------|-------------------------------|---------------------------------------------|
|                                                                                  |                | C-C          | C-O          | COO          | Ti-O         | Surface O-species<br>e.g. -OH | Adsorbed O-species<br>e.g. H <sub>2</sub> O |
| Ti <sub>3</sub> Al <sub>x</sub> C <sub>2</sub> T <sub>y</sub>                    | <b>BE / eV</b> | <b>284.8</b> | <b>286.3</b> | <b>288.5</b> | <b>529.6</b> | <b>531.3</b>                  | <b>533.9</b>                                |
|                                                                                  | Fractions / %  | 69.6         | 18.9         | 11.5         | 68.5         | 24.7                          | 6.8                                         |
| Pt <sub>0.5</sub> /Ti <sub>3</sub> Al <sub>x</sub> C <sub>2</sub> T <sub>y</sub> | <b>BE / eV</b> | <b>284.4</b> | <b>286</b>   | <b>288.3</b> | <b>529.6</b> | <b>531.6</b>                  | <b>534</b>                                  |
|                                                                                  | Fractions / %  | 77.2         | 12.3         | 10.5         | 75.5         | 19                            | 5.5                                         |
| Pt <sub>1.0</sub> /Ti <sub>3</sub> Al <sub>x</sub> C <sub>2</sub> T <sub>y</sub> | <b>BE / eV</b> | <b>284.6</b> | <b>286</b>   | <b>288.6</b> | <b>529.6</b> | <b>531.7</b>                  | <b>533.7</b>                                |
|                                                                                  | Fractions / %  | 70.8         | 18.2         | 11           | 71           | 22.9                          | 6.1                                         |
| Pt <sub>2.0</sub> /Ti <sub>3</sub> Al <sub>x</sub> C <sub>2</sub> T <sub>y</sub> | <b>BE / eV</b> | <b>284.7</b> | <b>286.3</b> | <b>288.6</b> | <b>529.7</b> | <b>531.4</b>                  | <b>534</b>                                  |
|                                                                                  | Fractions / %  | 72.8         | 16.1         | 11.1         | 79.7         | 15.4                          | 4.9                                         |
| Pt <sub>3.0</sub> /Ti <sub>3</sub> Al <sub>x</sub> C <sub>2</sub> T <sub>y</sub> | <b>BE / eV</b> | <b>284.6</b> | <b>286.1</b> | <b>288.6</b> | <b>529.5</b> | <b>531.5</b>                  | <b>533.4</b>                                |
|                                                                                  | Fractions / %  | 73.2         | 15.7         | 11.1         | 68.7         | 22.9                          | 8.4                                         |

**Table s2.** Ratio of metallic Pt and oxidized Pt quantified by XPS analysis

| Catalyst                                                                         | Bulk Pt loading<br>/ wt% (by ICP) | Metallic Pt<br>/ % (by XPS) | Pt-oxidized<br>/ % (by XPS) |
|----------------------------------------------------------------------------------|-----------------------------------|-----------------------------|-----------------------------|
| Pt <sub>0.5</sub> /Ti <sub>3</sub> Al <sub>x</sub> C <sub>2</sub> T <sub>y</sub> | 0.38                              | 89.5                        | 10.5                        |
| Pt <sub>1.0</sub> /Ti <sub>3</sub> Al <sub>x</sub> C <sub>2</sub> T <sub>y</sub> | 0.76                              | 89.4                        | 10.6                        |
| Pt <sub>2.0</sub> /Ti <sub>3</sub> Al <sub>x</sub> C <sub>2</sub> T <sub>y</sub> | 1.45                              | 96.7                        | 3.3                         |
| Pt <sub>3.0</sub> /Ti <sub>3</sub> Al <sub>x</sub> C <sub>2</sub> T <sub>y</sub> | 2.62                              | 95.4                        | 4.6                         |

## Section 2

**Table s3:** Detailed information on catalysts and calculation reaction rates.

| Samples                                                                           | Real loading of Pt / wt% | Catalyst mass / mg | Pt mass / mg <sub>Pt</sub> | Reaction rate / mmol <sub>FUR</sub> ·h <sup>-1</sup> | Reaction rate / mmol <sub>FUR</sub> ·g <sub>Pt</sub> <sup>-1</sup> ·h <sup>-1</sup> |
|-----------------------------------------------------------------------------------|--------------------------|--------------------|----------------------------|------------------------------------------------------|-------------------------------------------------------------------------------------|
| Pt <sub>0.5</sub> / Ti <sub>3</sub> Al <sub>x</sub> C <sub>2</sub> T <sub>y</sub> | 0.38                     | 100                | 0.38                       | 0.223                                                | 586.0                                                                               |
| Pt <sub>1.0</sub> / Ti <sub>3</sub> Al <sub>x</sub> C <sub>2</sub> T <sub>y</sub> | 0.76                     | 100                | 0.76                       | 0.514                                                | 676.3                                                                               |
| Pt <sub>2.0</sub> / Ti <sub>3</sub> Al <sub>x</sub> C <sub>2</sub> T <sub>y</sub> | 1.45                     | 100                | 1.45                       | 0.667                                                | 459.8                                                                               |
| Pt <sub>3.0</sub> / Ti <sub>3</sub> Al <sub>x</sub> C <sub>2</sub> T <sub>y</sub> | 2.62                     | 100                | 2.62                       | 0.667                                                | 254.5                                                                               |
| 3.0%Pt/ Ti <sub>3</sub> Al <sub>x</sub> C <sub>2</sub> T <sub>y</sub>             | 0.63                     | 100                | 0.63                       | 0.183                                                | 291.0                                                                               |
| 3.0%Pt/TiO <sub>2</sub>                                                           | 1.84                     | 100                | 1.84                       | 0.165                                                | 89.9                                                                                |
| 3.0%Pt/AC                                                                         | 0.78                     | 100                | 0.78                       | 0.3                                                  | 384.6                                                                               |

## Section 3

The N<sub>2</sub> adsorption-desorption isotherms and pore size distributions of selected samples of Ti<sub>3</sub>AlC<sub>2</sub> (0.6 m<sup>2</sup>/g), Ti<sub>3</sub>Al<sub>x</sub>C<sub>2</sub>T<sub>y</sub> (2.9 m<sup>2</sup>/g) and Pt<sub>2.0</sub>/Ti<sub>3</sub>Al<sub>x</sub>C<sub>2</sub>T<sub>y</sub> (12.7 m<sup>2</sup>/g).

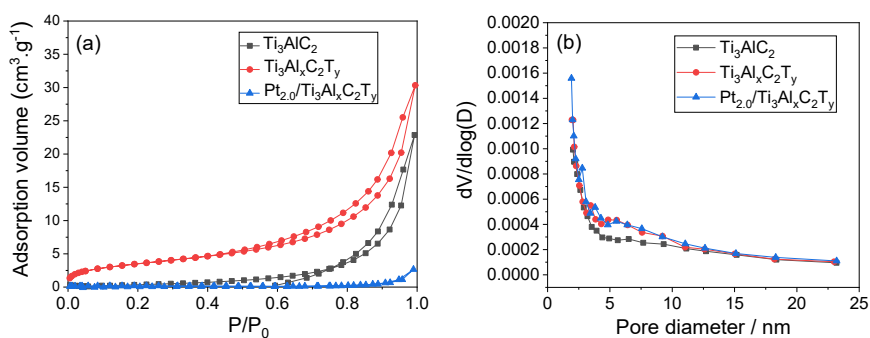

**Figure s2.** (a) The N<sub>2</sub> adsorption-desorption curves and (b) the pore size distributions of three selected samples: Ti<sub>3</sub>AlC<sub>2</sub>, Ti<sub>3</sub>Al<sub>x</sub>C<sub>2</sub>T<sub>y</sub> and Pt<sub>2.0</sub>/Ti<sub>3</sub>Al<sub>x</sub>C<sub>2</sub>T<sub>y</sub>.

## Section 4

The SEM images of catalysts showed that most products were fibrous nanomaterials as expected, which were conducive to recycle from aqueous reaction systems.

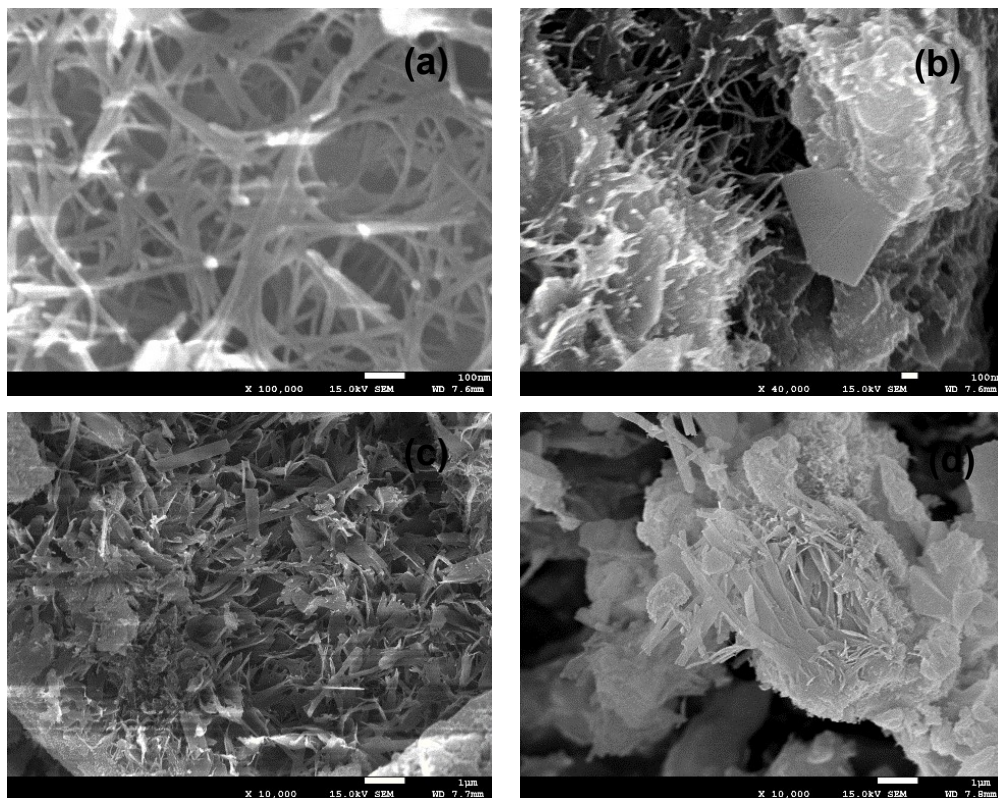

**Figure s3.** SEM images of (a)  $\text{Pt}_{0.5}/\text{Ti}_3\text{Al}_x\text{C}_2\text{T}_y$ , (b)  $\text{Pt}_{1.0}/\text{Ti}_3\text{Al}_x\text{C}_2\text{T}_y$ , (c)  $\text{Pt}_{2.0}/\text{Ti}_3\text{Al}_x\text{C}_2\text{T}_y$ , (d)  $\text{Pt}_{3.0}/\text{Ti}_3\text{Al}_x\text{C}_2\text{T}_y$

## Section 5

The Pt particle sizes of benchmark catalysts of Pt/TiO<sub>2</sub> and Pt/AC were analyzed on the basis of TEM images using the same method. The histograms of them were shown in **Figure s4** as insets, which demonstrated that the size of Pt NPs was 3-10 nm on TiO<sub>2</sub> and was 2-9 nm on AC.

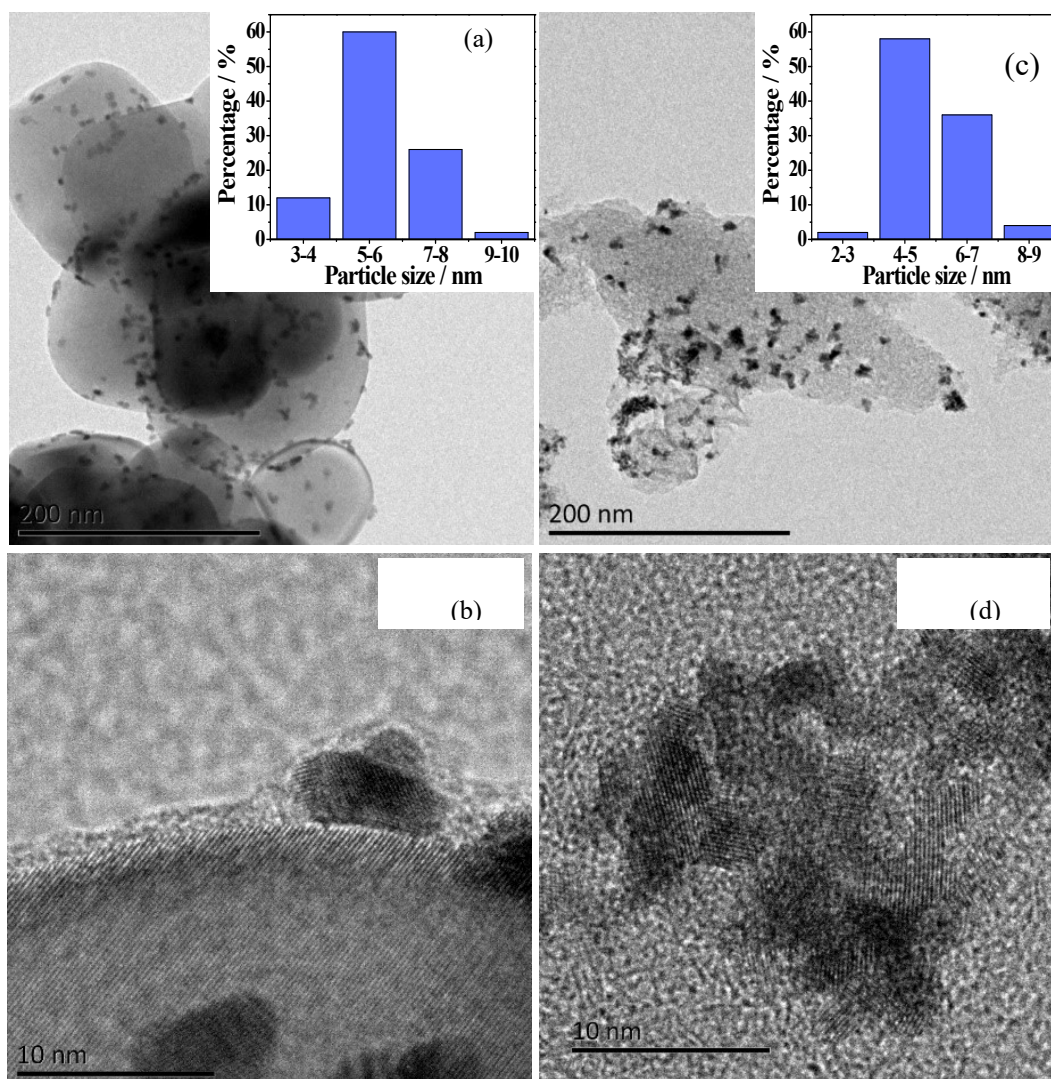

**Figure s4.** The TEM image **(a)** and the HR TEM image **(b)** of 3%Pt/TiO<sub>2</sub> (mean size: 6.3 nm); the TEM image **(c)** and the HR TEM image **(d)** of 3%Pt/AC (mean size 5.8 nm).

## Section 6

TEM images of four catalysts:  $\text{Pt}_{0.5}/\text{Ti}_3\text{Al}_x\text{C}_2\text{T}_y$ ,  $\text{Pt}_{1.0}/\text{Ti}_3\text{Al}_x\text{C}_2\text{T}_y$ ,  $\text{Pt}_{2.0}/\text{Ti}_3\text{Al}_x\text{C}_2\text{T}_y$ , and  $\text{Pt}_{3.0}/\text{Ti}_3\text{Al}_x\text{C}_2\text{T}_y$ , with different magnifications were provided to give more information on the morphologies and particle sizes of Pt NPs.

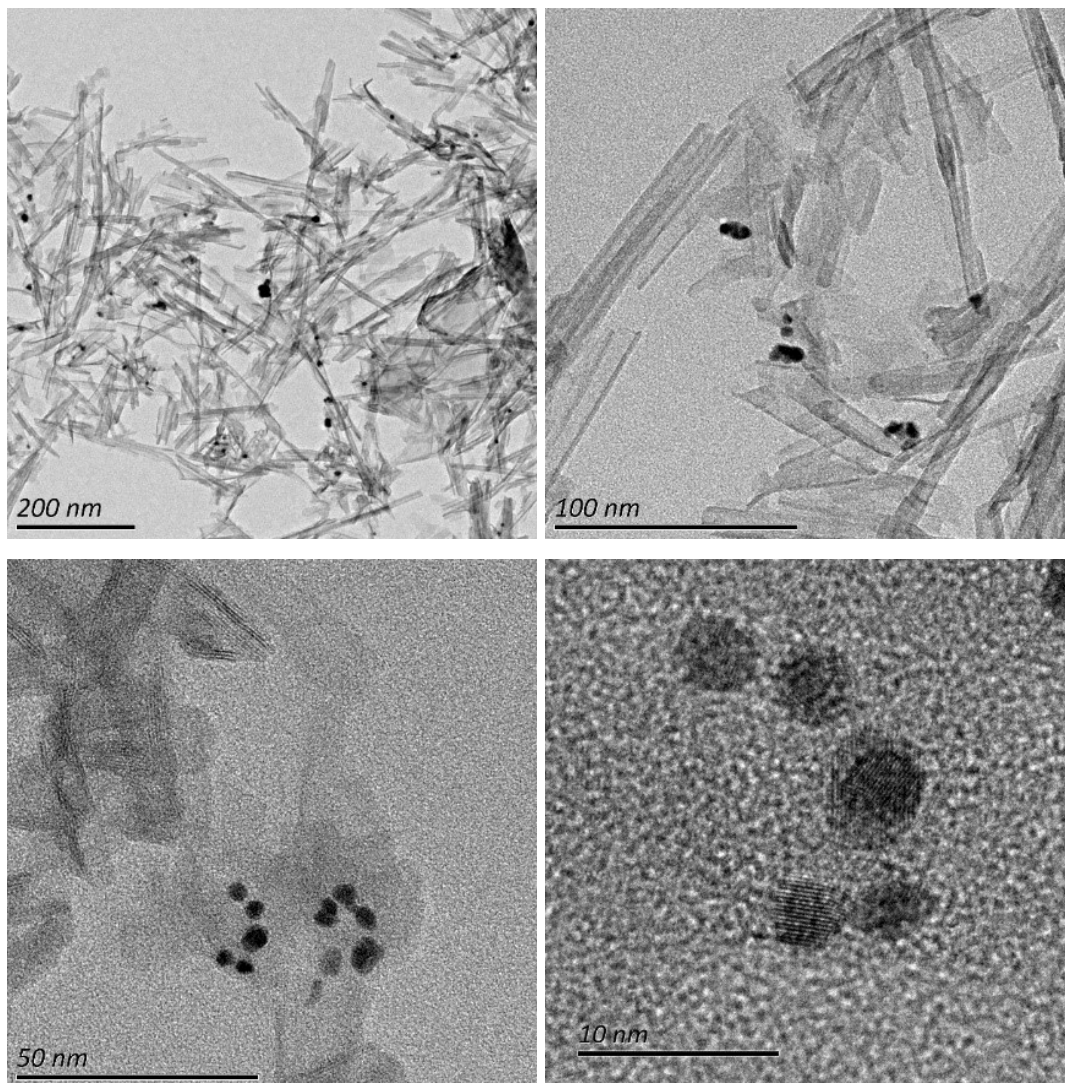

**Figure s5.** TEM images of  $\text{Pt}_{0.5}/\text{Ti}_3\text{Al}_x\text{C}_2\text{T}_y$  catalysts

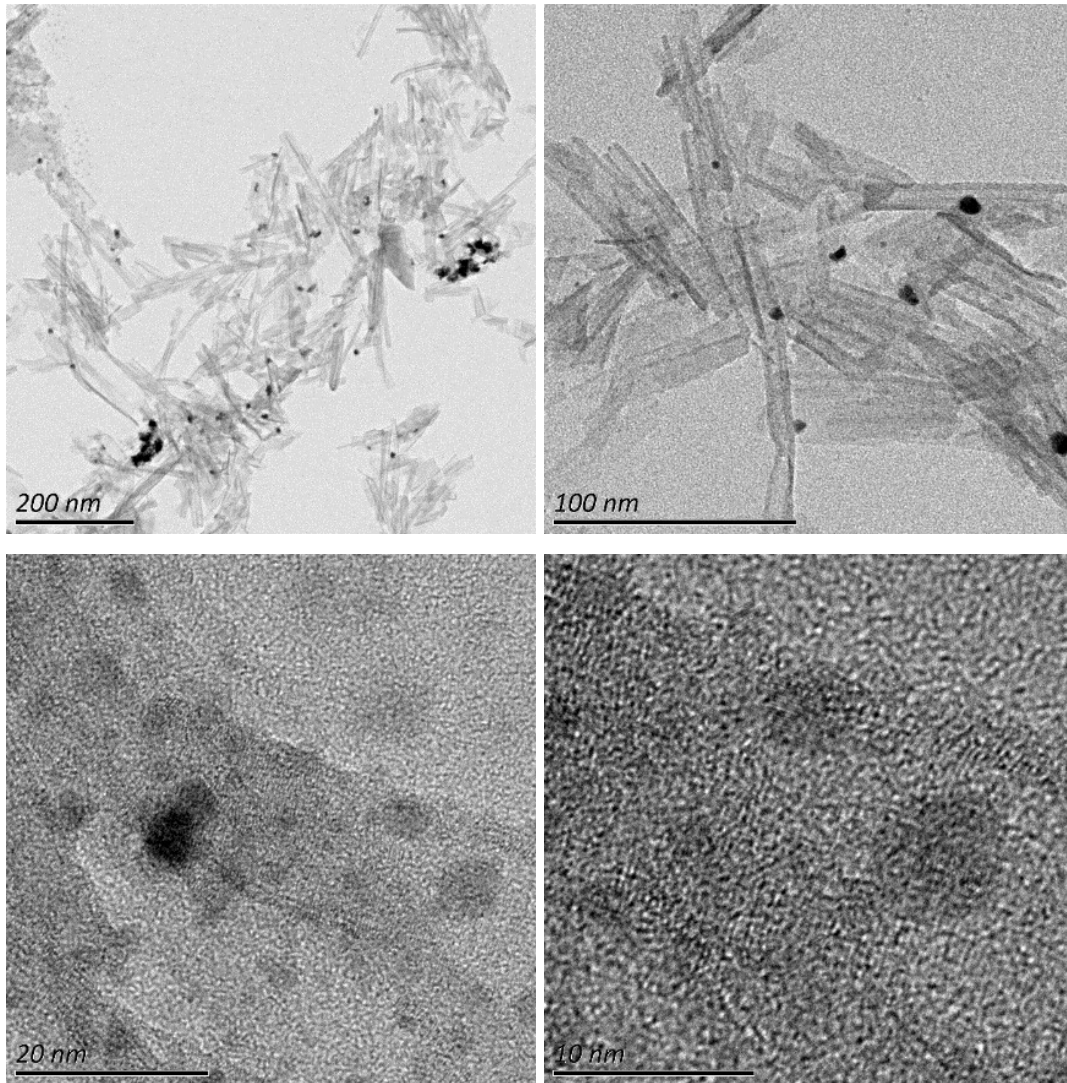

**Figure s6.** TEM images of  $\text{Pt}_{1.0}/\text{Ti}_3\text{Al}_x\text{C}_2\text{T}_y$  catalysts



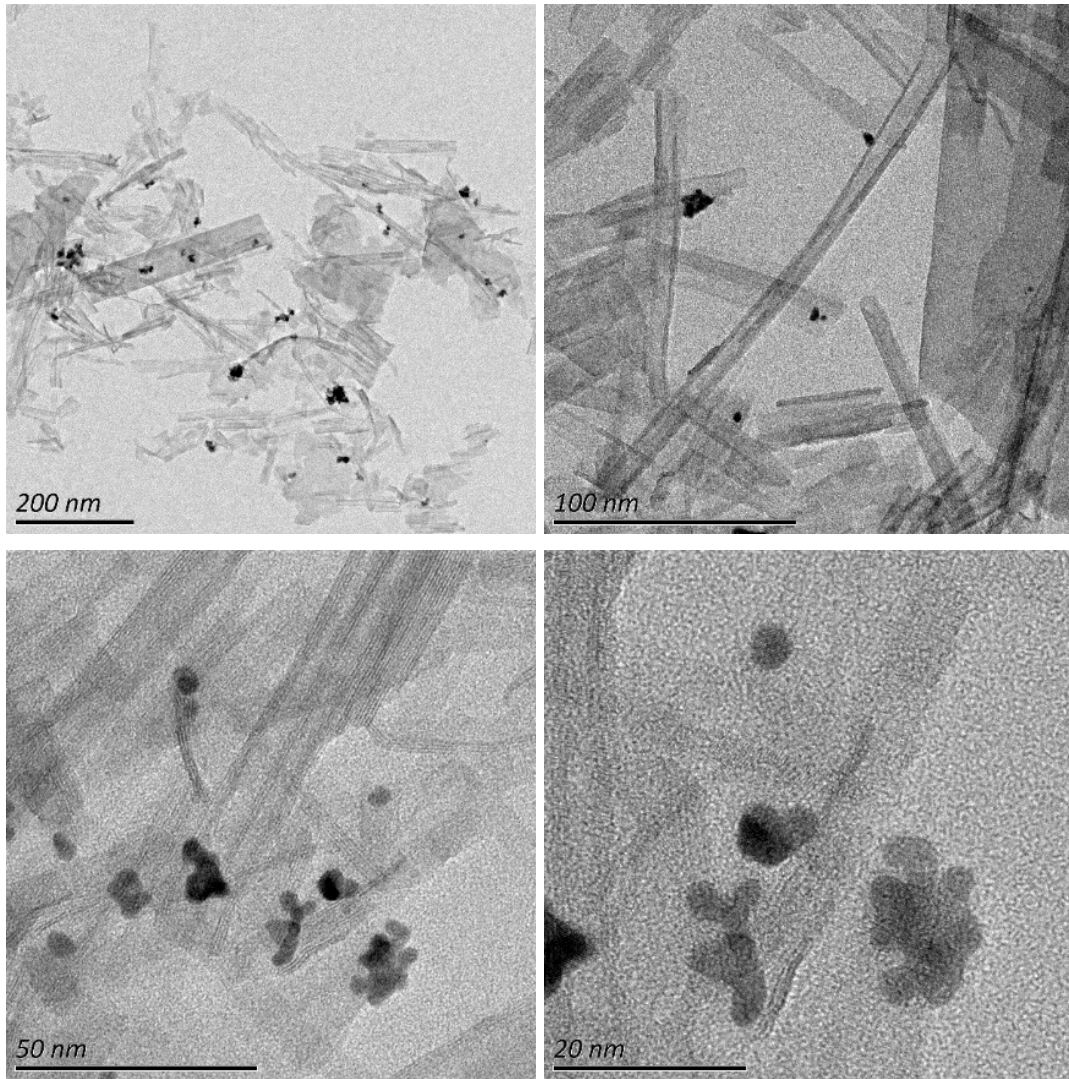

**Figure s7.** TEM images of Pt<sub>2.0</sub>/Ti<sub>3</sub>Al<sub>x</sub>C<sub>2</sub>T<sub>y</sub> catalysts

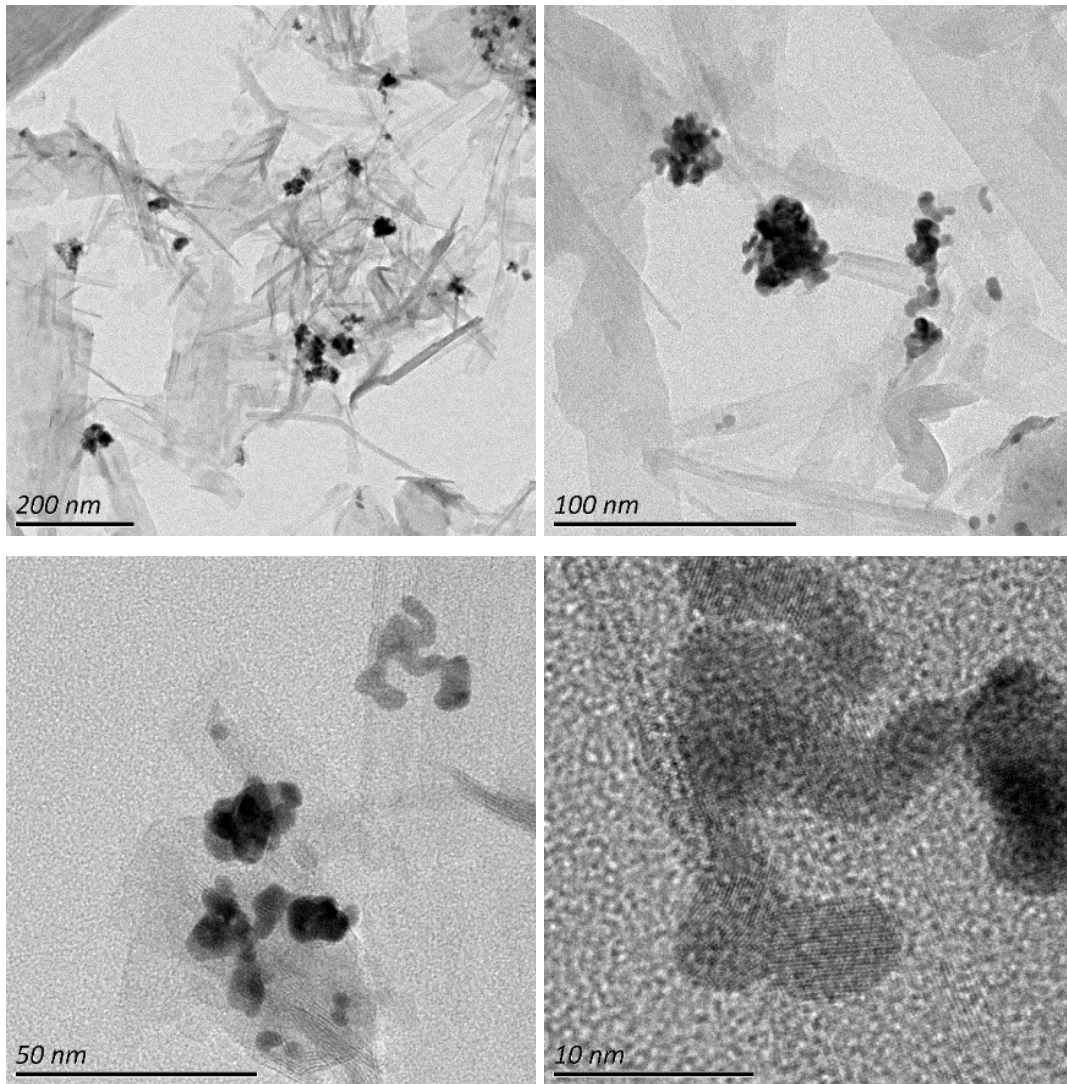

**Figure s8.** TEM images of Pt<sub>3.0</sub>/Ti<sub>3</sub>Al<sub>x</sub>C<sub>2</sub>T<sub>y</sub> catalysts

## Section 7

The TEM images of **spent Pt<sub>2.0</sub>/Ti<sub>3</sub>Al<sub>x</sub>C<sub>2</sub>T<sub>y</sub>** showed that the Pt nanostructures were mostly nanoparticles prepared by the new reduction method.

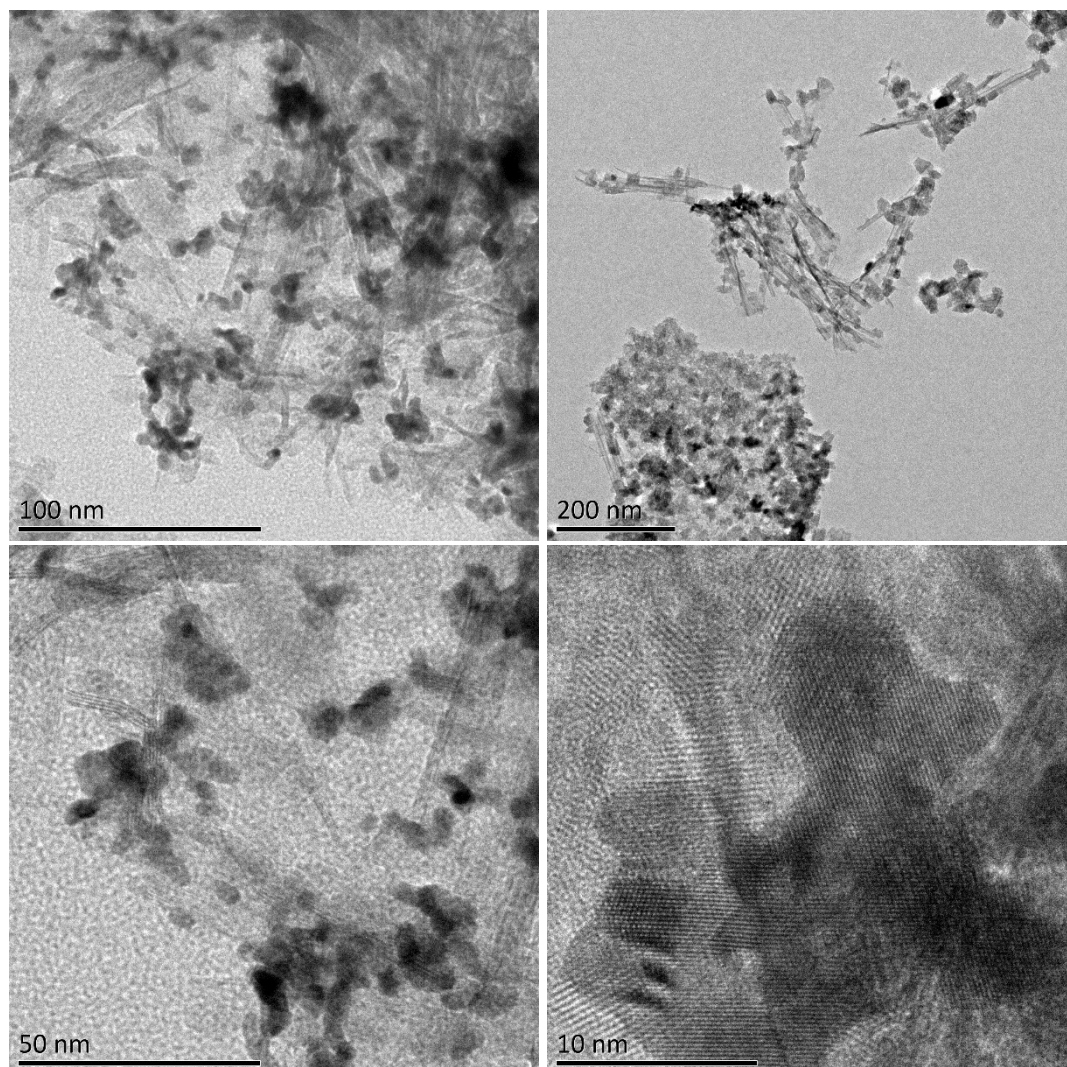

**Figure s9.** TEM images of spent Pt<sub>2.0</sub>/Ti<sub>3</sub>Al<sub>x</sub>C<sub>2</sub>T<sub>y</sub>

The TEM images of **spent 3%Pt/Ti<sub>3</sub>Al<sub>x</sub>C<sub>2</sub>T<sub>y</sub>** showed that the Pt nanostructures were mostly nanoclusters prepared by the chemical reduction (CR) method.

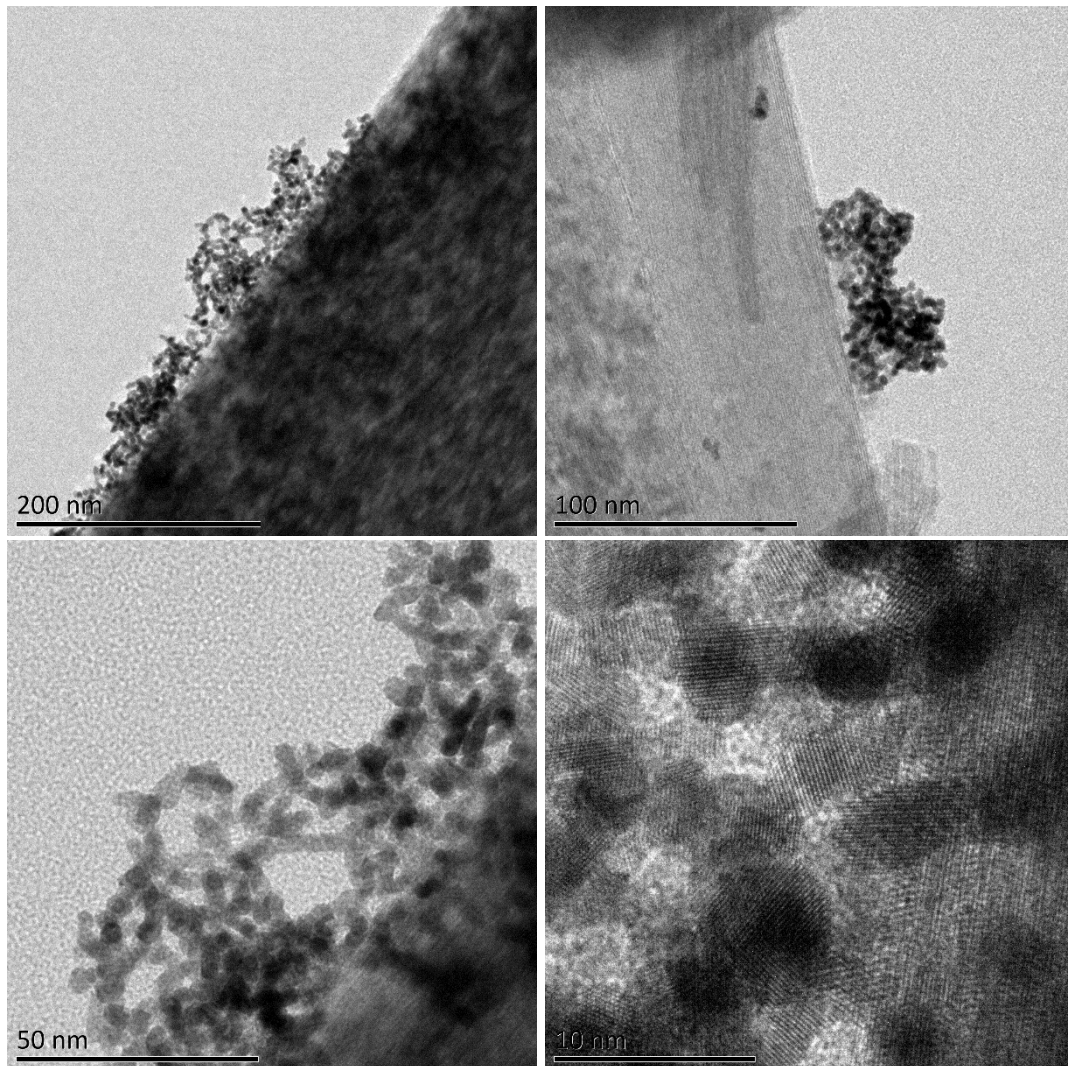

**Figure s10.** TEM images of spent 3%Pt/Ti<sub>3</sub>Al<sub>x</sub>C<sub>2</sub>T<sub>y</sub>
